# Supplementary material for: The impact of climate change and natural climate variability on the global distribution of Aedes aegypti
Source: bioRxiv or medRxiv preprint supplement (doi:10.1101/2023.08.31.23294902), 2023-08-31
Supplement: Supplementary file [file media-1.pdf]

1 **Supplementary Material for *The impact of climate change and natural climate variability on the***  
2 ***global distribution of Aedes aegypti***

3 AR Kaye<sup>1,2</sup>, U Obolski<sup>3,4</sup>, L Sun<sup>5</sup>, JW Hurrell<sup>5</sup>, MJ Tildesley<sup>1,2,6</sup>, RN Thompson<sup>1,2,7\*</sup>

4 **Affiliations:**

5 <sup>1</sup>Mathematics Institute, University of Warwick, Coventry, CV4 7AL, UK

6 <sup>2</sup>Zeeman Institute for Systems Biology and Infectious Disease Epidemiology Research (SBIDER),  
7 University of Warwick, Coventry, CV4 7AL, UK

8 <sup>3</sup>Department of Epidemiology and Preventive Medicine, School of Public Health, Faculty of  
9 Medicine, Tel Aviv University, Tel Aviv-Yafo, 6997801, Israel

10 <sup>4</sup>Porter School of the Environment and Earth Sciences, Faculty of Exact Sciences, Tel Aviv  
11 University, Tel Aviv-Yafo, 6997801, Israel

12 <sup>5</sup>Department of Atmospheric Science, Colorado State University, Fort Collins, CO 80521, USA

13 <sup>6</sup>School of Life Sciences, University of Warwick, Coventry, CV4 7AL, UK

14 <sup>7</sup>Mathematical Institute, University of Oxford, Oxford, OX2 6GG, UK

15

16 \*Correspondence to: [robin.thompson@st-hildas.ox.ac.uk](mailto:robin.thompson@st-hildas.ox.ac.uk)

## Supplementary Text

17

### 18 **Supplementary details about the ecological model and its parameterisation**

#### 19 The ecological model

20 As described in the main text, in the ecological model the *Ae. aegypti* population is divided  
21 according to their life cycle stage: eggs ( $E$ ), aquatic stage (larvae or pupae;  $A$ ) and adult  
22 female mosquitoes ( $M$ ). The compartmental, ordinary differential equation model is given by

$$23 \quad \frac{dE}{dt} = a(T)M - b(T)E,$$

$$24 \quad \frac{dA}{dt} = b(T)E \left(1 - \frac{A}{K(R)}\right) - c(R)A - d(T)A - f(T)A,$$

$$25 \quad \frac{dM}{dt} = \frac{1}{2}f(T)A - g(T)M,$$

26 in which  $T$  indicates dependence on temperature ( $^{\circ}\text{C}$ ) and  $R$  indicates dependence on rainfall  
27 ( $\text{mm day}^{-1}$ ).

28 The parameter  $a(T)$  is the birth rate (eggs per adult female per day),  $b(T)$  is the egg-to-  
29 aquatic development rate (in a setting in which the birth rate is not resource limited),  $d(T)$  is  
30 the aquatic stage death rate,  $f(T)$  is the aquatic-to-adult development rate and  $g(T)$  is the  
31 adult death rate. Rainfall-dependence is included through the aquatic stage carrying capacity  
32 ( $K(R)$ ) and the rate at which aquatic stage individuals are washed away ( $c(R)$ ). The factor of  
33  $\frac{1}{2}$  is included in the final equation as we are predominantly interested in female adults; male

34 adults do not spread pathogens. However, we include male *Ae. aegypti* in the model up to the  
35 adult stage, since they contribute to competition for resources.

36 For fixed temperature and rainfall values, the non-zero equilibrium value of  $M$  under this  
37 model is given by

$$38 \quad M^* = K(R) \left( \frac{f(T)}{2g(T)} - \frac{c(R) + d(T) + f(T)}{a(T)} \right).$$

39 The value of  $M^*$  is positive, so that a self-sustaining *Ae. aegypti* population is possible, when

$$40 \quad \frac{f(T)}{2g(T)} > \frac{c(R) + d(T) + f(T)}{a(T)}.$$

41 This expression is used as the basis for the ecological niche shown in Fig 1C in the main text.

#### 42 Temperature-dependent model parameters

43 The relationships between temperature and each temperature-dependent model parameter are  
44 determined based on the data reported by Mordecai *et al.*<sup>1</sup> Details for each model parameter  
45 are given below (further information about the functional forms of the fitted relationships are  
46 provided in the following subsection):

- 47 • Birth rate,  $a(T)$ : We fitted a Brière equation directly to data describing the  
48 number of eggs laid per adult female per day at different temperature values.
- 49 • Egg-to-aquatic development rate,  $b(T)$ : Data describing the egg-to-aquatic  
50 development rate were not available from the Mordecai *et al.*<sup>1</sup> study. We therefore  
51 estimated  $b(T)$  indirectly by first fitting a Brière equation to data describing the  
52 egg-to-adult development rate as a function of temperature ( $\gamma(T)$ , say).  
53 Neglecting resource limitation, and the possibility that aquatic stage individuals  
54 die or are washed away, the egg-to-adult development rate depends on both the  
55 egg-to-aquatic and aquatic-to-adult development rates. A previous study by Silva

56 *et al.*<sup>2</sup> in which climate dependence was not considered found that mean egg-to-  
57 aquatic and aquatic-to-adult development rates were 0.24 day<sup>-1</sup> and 0.125 day<sup>-1</sup>,  
58 respectively. Assuming that the ratio between these quantities applies at all  
59 temperatures, then  $b(T) = \frac{0.125+0.24}{0.125} \gamma(T) = \frac{73}{25} \gamma(T)$ .

60 • Aquatic-to-adult development rate,  $f(T)$ : Analogously to estimating the egg-to-  
61 aquatic development rate,  $f(T) = \frac{73}{48} \gamma(T)$ .

62 • Aquatic stage death rate,  $d(T)$ . Data were available<sup>1</sup> describing the probability  
63 that an individual survives from egg to adult at different temperatures ( $p(T)$ , say).  
64 We fitted a quadratic equation to these data. Neglecting resource limitation, and  
65 the possibility that aquatic stage individuals are washed away, gives  $p(T) =$   
66  $\frac{f(T)}{d(T)+f(T)}$  and so  $d(T) = f(T) \left( \frac{1}{p(T)} - 1 \right)$ .

67 • Adult death rate,  $g(T)$ . A quadratic equation was fitted directly to data describing  
68 the adult lifespan ( $1/g(T)$ ) at different temperature values.

69 Parameters fits are shown for  $a(T)$  (Fig S2),  $\gamma(T)$  (Fig S3),  $p(T)$  (Fig S4) and  $1/g(T)$  (Fig  
70 S5), from which the posteriors for the temperature-dependent parameters of the ecological  
71 model were obtained (Fig S6A-D).

## 72 Details of the temperature-dependent parameter fitting

73 As described above, a Brière equation or a quadratic equation was fitted to determine the  
74 relationship between individual *Ae. aegypti* model parameters and temperature. Both of these  
75 functions have a similar peaked shape, but Brière equations are asymmetric whereas  
76 quadratic equations are symmetric about the peak value. We therefore chose whether to fit a  
77 Brière or quadratic equation to determine the relationship between temperature and each

78 fitted parameter according to whether the relevant data appeared to be symmetric about their  
79 peak. This approach was also used by Mordecai *et al.*<sup>1</sup>

80 The functional form of the fitted Brière equation for the *Ae. aegypti* birth rate is

$$81 \quad \alpha(T) = \max\left(0, \operatorname{Re}\left(\alpha T(T - T_0)\sqrt{T_m - T}\right) + \mathcal{N}(0, \sigma^2)\right), \quad (\text{S1})$$

82 in which  $\operatorname{Re}(z)$  denotes the real part of the complex number  $z$ , and  $\mathcal{N}(0, \sigma^2)$  represents  
83 Gaussian noise with mean zero and variance  $\sigma^2$ . An analogous equation was used when we  
84 characterised  $\gamma(T)$  using a Brière equation. Similarly, the quadratic functional form for  $p(T)$   
85 is

$$86 \quad p(T) = \max\left(0, -\alpha(T - T_0)(T - T_m) + \mathcal{N}(0, \sigma^2)\right), \quad (\text{S2})$$

87 in which  $T_m > T_0$ , with a similar equation for  $1/g(T)$ .

88 Here, we describe the details of the MCMC approach used to determine the sub-parameters  
89  $\alpha$ ,  $T_0$ ,  $T_m$  and  $\sigma^2$  of  $a(T)$ . A similar method was used for all fitted temperature-dependent  
90 responses (and we reused the same notation for the sub-parameters – i.e.,  $\alpha$ ,  $T_0$ ,  $T_m$  and  $\sigma^2$  –  
91 in each case).

92 The Metropolis-Hastings algorithm was used. In each step of the MCMC chain, new values  
93 of  $\alpha$ ,  $T_0$ ,  $T_m$  and  $\sigma^2$  were proposed, each sampled from independent Gaussian proposal  
94 distributions with mean equal to the current value and variances  $5 \times 10^{-3}$ , 1, 0.1 and 1,  
95 respectively. These variance values (referred to as  $\Sigma$  values in Tables S1 and S2) were chosen  
96 to achieve an acceptance rate of around 0.234.<sup>3</sup> The  $\Sigma$  values for other fitted temperature-  
97 dependent parameters are shown in Tables S1 and S2, along with the priors used for each  
98 sub-parameter. The algorithm was run for 100,000 steps, including a burn-in of 50,000 steps.

99 We repeated the fitting procedure a further four times, each time starting the MCMC chain  
100 from a different initial state, allowing us to confirm convergence of the original chain using  
101 the Gelman-Rubin statistic (see captions to Figs S2-S5). When fitting the temperature-  
102 dependent response for  $a(T)$ , the initial value of  $\alpha$  was sampled for each chain from a  
103  $U(1 \times 10^{-3}, 1 \times 10^{-1})$  distribution,  $T_0$  was sampled from a  $U(0,20)$  distribution,  $T_m$  was  
104 sampled from a  $U(20,40)$  distribution and  $\sigma^2$  was sampled from a  $U(1,10)$  distribution. The  
105 distributions from which the initial values were sampled for the other temperature-dependent  
106 responses are shown in Tables S1 and S2.

107

| Parameter                                     | Sub-parameter | Prior                | Initial value         | $\Sigma$ Value     |
|-----------------------------------------------|---------------|----------------------|-----------------------|--------------------|
| Birth rate, $a(T)$                            | $\alpha$      | $\Gamma(2, 10^{-2})$ | $U(10^{-3}, 10^{-1})$ | $5 \times 10^{-3}$ |
|                                               | $T_0$         | $\Gamma(10, 2)$      | $U(0, 20)$            | 1                  |
|                                               | $T_m$         | $\Gamma(10, 4)$      | $U(20, 40)$           | 0.1                |
|                                               | $\sigma^2$    | $U(0, 10)$           | $U(1, 10)$            | 1                  |
| Egg-to-adult development<br>rate, $\gamma(T)$ | $\alpha$      | $\Gamma(9, 10^{-5})$ | $U(10^{-5}, 10^{-3})$ | $5 \times 10^{-6}$ |
|                                               | $T_0$         | $\Gamma(7, 2)$       | $U(0, 20)$            | 0.5                |
|                                               | $T_m$         | $\Gamma(10, 4)$      | $U(20, 50)$           | 0.5                |
|                                               | $\sigma^2$    | $U(0, 1)$            | $U(0, 1)$             | 0.01               |

108 **Table S1. Technical details of the MCMC procedure used to determine the temperature-dependent**  
109 **responses of  $a(T)$  and  $\gamma(T)$ .** Due to the asymmetric nature of the data for these parameters, Brière equations  
110 were used (equation S1). The notation  $\Gamma(x, y)$  represents a gamma distribution with shape parameter  $x$  and scale  
111 parameter  $y$ , and  $U(x, y)$  is a continuous uniform distribution with bounds  $x$  and  $y$ . The initial value in the  
112 MCMC chain of each sub-parameter was sampled from the distributions listed in the fourth column.

113

| Parameter                                 | Sub-parameter | Prior              | Initial value     | $\Sigma$ Value |
|-------------------------------------------|---------------|--------------------|-------------------|----------------|
| Egg-to-adult survival probability, $p(T)$ | $\alpha$      | $\Gamma(7, 0.001)$ | $U(0.0001, 0.01)$ | 0.0001         |
|                                           | $T_0$         | $\Gamma(7, 2)$     | $U(0, 20)$        | 0.5            |
|                                           | $T_m$         | $\Gamma(10, 4)$    | $U(20, 50)$       | 0.5            |
|                                           | $\sigma^2$    | $U(0, 5)$          | $U(0, 2)$         | 0.01           |
| Adult lifespan, $1/g(T)$                  | $\alpha$      | $\Gamma(1, 0.5)$   | $U(0.01, 1)$      | 0.015          |
|                                           | $T_0$         | $\Gamma(5, 2)$     | $U(0, 20)$        | 1              |
|                                           | $T_m$         | $\Gamma(9, 5)$     | $U(20, 50)$       | 1              |
|                                           | $\sigma^2$    | $U(0, 50)$         | $U(0, 20)$        | 1              |

115 **Table S2. Technical details of the MCMC procedure used to determine the temperature-dependent**  
 116 **responses of  $p(T)$  and  $1/g(T)$ .** Due to the symmetric nature of the data for these parameters, quadratic  
 117 equations were used (equation S2). The notation  $\Gamma(x, y)$  represents a gamma distribution with shape parameter  
 118  $x$  and scale parameter  $y$ , and  $U(x, y)$  is a continuous uniform distribution with bounds  $x$  and  $y$ . The initial value  
 119 in the MCMC chain of each sub-parameter was sampled from the distributions listed in the fourth column.

120

### 121 Rainfall-dependent model parameters

122 Two ecological model parameters were assumed to depend on rainfall: the aquatic stage  
 123 carrying capacity ( $K(R)$ ) and the rate at which aquatic stage individuals are washed away  
 124 (the larval flush out rate,  $c(R)$ ). Relationships between the amount of rainfall and the values  
 125 of these parameters were derived using the approach of Tompkins and Ermert.<sup>4</sup>

#### 126 *Aquatic stage carrying capacity, $K(R)$*

127 The aquatic stage carrying capacity is defined as  $K(R) = k(R)D$ , in which  $k(R)$  is the  
 128 carrying capacity per unit area and  $D$  is the area of the location under consideration. We  
 129 defined  $k(R) = w(R) \frac{M_L}{m}$ , with  $w(R)$  denoting the proportion of land covered with *Ae*.

130 *aegypti* breeding sites,  $M_L$  denoting the total mass of aquatic stage individuals that can be

131 present at a breeding site and  $m$  denoting the average mass of an individual in the aquatic  
132 phase. Following Tompkins and Ermert,<sup>4</sup>

133 
$$\frac{dw(R)}{dt} = \kappa[R(w_{max} - w(R)) - w(R)(\eta + \zeta)],$$

134 in which  $w_{max}$  is the proportion of the land surface that is covered by depressions that can  
135 become filled with water. The parameter  $\kappa$  is based on the geometry of the depressions, and  
136 sets the overall rate at which they are filled with or lose water, and the parameters  $\eta$  and  $\zeta$  set  
137 the relative rates at which water evaporates and is infiltrated into the ground, respectively.

138 The equilibrium value of  $w(R)$  is then

139 
$$w(R) = \frac{Rw_{max}}{\eta + \zeta + R},$$

140 so that the aquatic stage carrying capacity per unit area is

141 
$$k(R) = \frac{Rw_{max}}{\eta + \zeta + R} \frac{M_L}{m},$$

142 and

143 
$$K(R) = \frac{Rw_{max}}{\eta + \zeta + R} \frac{M_L D}{m}.$$

144 We set  $\eta = 5 \text{ mm day}^{-1}$ ,<sup>4</sup>  $\zeta = 245 \text{ mm day}^{-1}$ ,<sup>4</sup>  $M_L = 300 \text{ mg m}^{-2}$ ,<sup>4</sup> and  $m = 4.59 \text{ mg}$  (this is  
145 the average mass from a sample of 1000 male and 1000 female pupae<sup>5</sup>). We set  $w_{max} = \frac{1}{25}$ ,  
146 so that 4% of the land's surface can become filled with water.<sup>4</sup>

147 In the expression above, in the absence of rainfall, then  $K(0) = 0$ . When there is a very large  
148 amount of rainfall,  $K(R)$  tends to a constant value (the maximum possible carrying capacity).

149 The dependence of  $K(R)$  on  $R$  is shown for values of  $R$  between 0 and 25  $\text{mm day}^{-1}$  in Fig  
150 S6E. For comparison, we also plot the (constant) carrying capacity from a model developed



151 by Silva *et al.*<sup>2</sup> The study location in that research was Nova Iguaçu, Brazil which has an  
152 average daily rainfall of 4.89mm. This is consistent with the corresponding value of  $K(R)$  in  
153 our model (Fig S6E).

154 *Larval flush out rate,  $c(R)$*

155 Each day, the probability that an aquatic stage individual survives being washed away is  
156 assumed to have the form<sup>4</sup>

157 
$$K_f(R) = C_1 + C_2 \exp(-C_3 R).$$

158 We assume that, in the absence of rainfall, individuals will not be washed away, and for large  
159 amounts of rainfall, individuals will definitely be washed away. Consequently,  $K_f(0) = 1$   
160 and  $K_f(R) \rightarrow 0$  as  $R \rightarrow \infty$ . Setting  $C_3 = 1$ , so that the daily survival probability is 0.25 at a  
161 moderate rainfall level of 500 mm year<sup>-1</sup>,<sup>6</sup> gives  $K_f(R) = \exp(-R)$ .

162 We note that, in the ecological model, larval flush out occurs at (exponential) rate  $c(R)$ .  
163 Hence, the probability of an aquatic stage individual surviving any single day is  $\exp(-c(R))$ .  
164 Matching this with the expression above gives  $c(R) = R$  (Fig S6F).

165 We also conducted supplementary analyses in which we considered the sensitivity of our  
166 results to the shape of the ecological niche by considering different assumptions about the  
167 relationship between rainfall and the rate at which aquatic stage individuals are washed away.  
168 Specifically, we also considered scenarios in which  $c(R) = 2R$  (Figs S11A and S12A) and  
169  $c(R) = \frac{1}{2}R$  (Figs S11B and S12B). In each case that we considered, our qualitative findings

170 about the likely future poleward spread of *Ae. aegypti* and the substantial impact of natural  
171 climate variability were unchanged.

172

173 **Supplementary Figures**

174

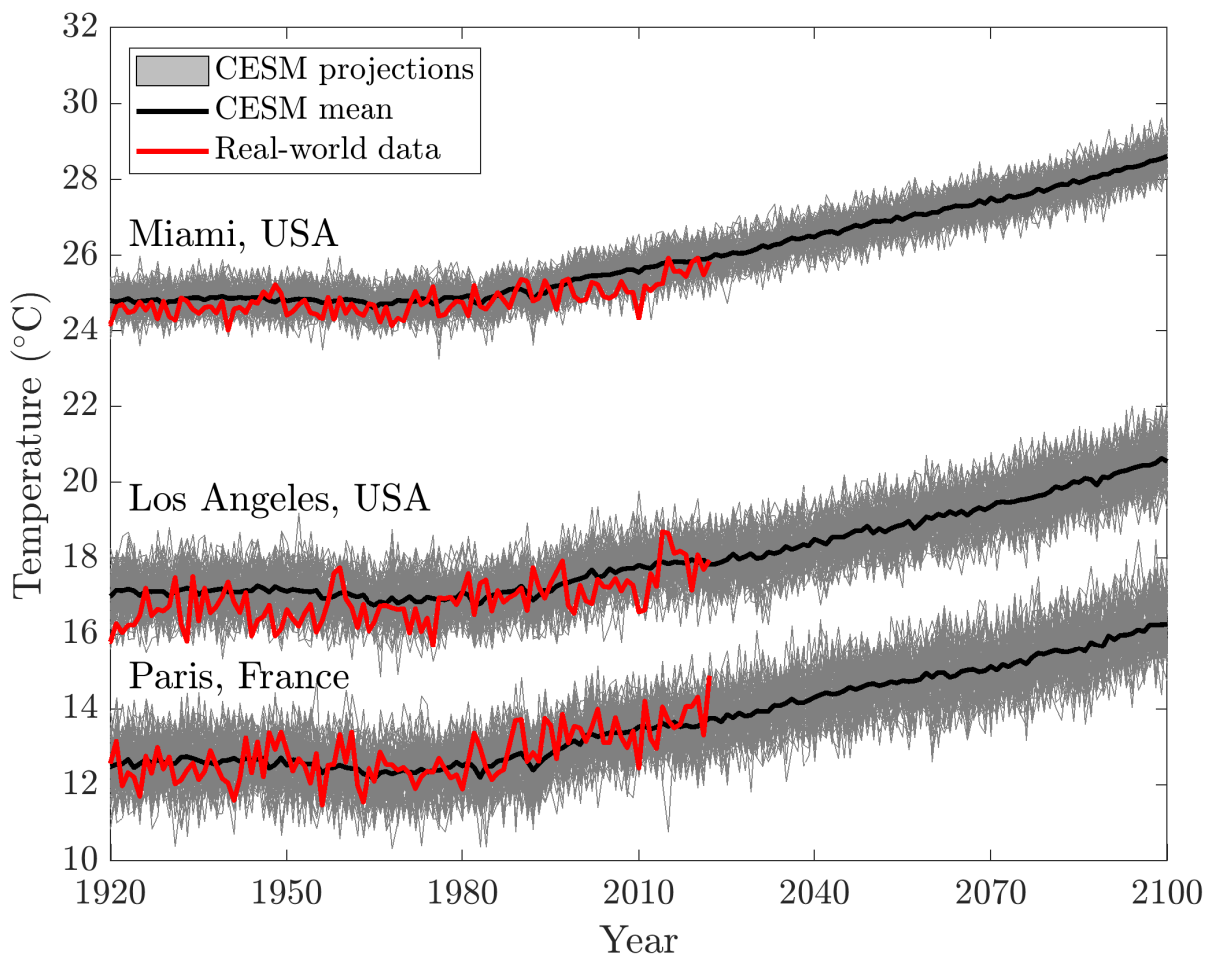

175

176 **Figure S1. The variability in real-world climate data exceeds that of the CESM ensemble mean.** As an  
177 example, temperature data were extracted from the CESM LENS2 dataset in the locations of Miami, Los  
178 Angeles and Paris covering the period from 1920-2100, and the yearly mean was considered. This figure  
179 indicates the signal due to anthropogenic climate change (mean of the CESM projections – black), the individual  
180 CESM projections (grey) and the temperature observed in the real-world from 1920-2022 (extracted from the  
181 Berkeley Earth Surface Temperatures online database;<sup>7</sup> red). This indicates that the variability in real-world

182 climate data is more accurately represented by the variability across the CESM simulations, rather than the  
 183 ensemble mean.

184

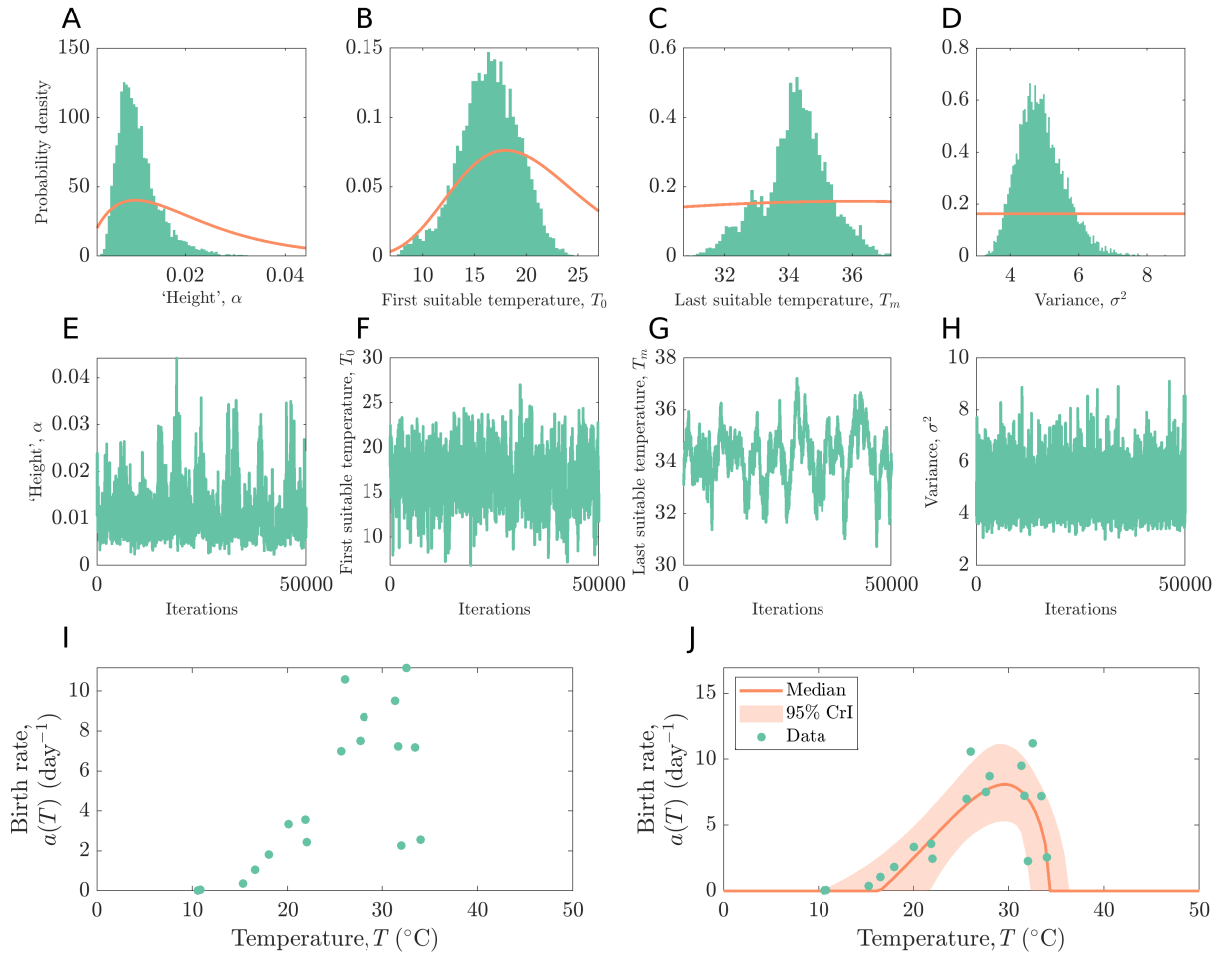

185

186 **Figure S2. The dependence of the *Ae. aegypti* birth rate ( $a(T)$ ) on temperature.** A-D. Prior (red) and  
 187 posterior (green) distributions for each of the fitted sub-parameters ( $\alpha$ ,  $T_0$ ,  $T_m$  and  $\sigma^2$ ). To allow the posterior  
 188 distribution to be seen clearly, x-axes limits are restricted to the minimum and maximum values in the posterior.  
 189 E-H. Trace plots corresponding to the posterior distributions shown in panels A-D. 100,000 steps were run in  
 190 the MCMC chain, with the first 50,000 discarded as burn-in (acceptance rate: 0.2419). Five chains were run to  
 191 compute the Gelman-Rubin statistic (which was 1.0141, 1.0015, 1.0222 and 1.0034 for  $\alpha$ ,  $T_0$ ,  $T_m$  and  $\sigma^2$ ,  
 192 respectively); the trace plots in panels E-H are from the first chain. I. Data describing the *Ae. aegypti* birth rate  
 193 as a function of temperature. J. Brière equation fit to the data in panel I (data – green; median fit – red; 95%  
 194 equal-tailed credible interval – shaded region).

195

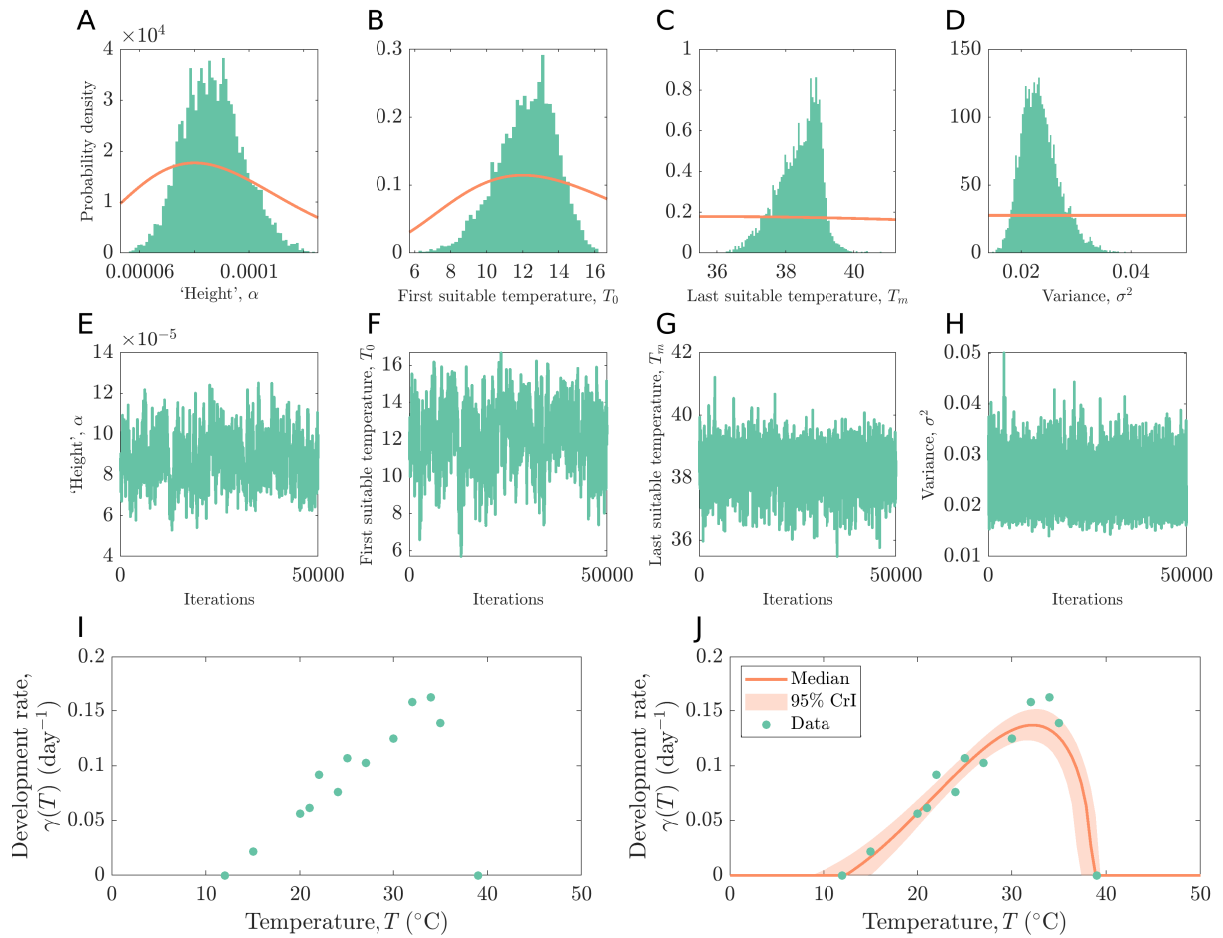

196

197 **Figure S3. The dependence of the *Ae. aegypti* egg-to-adult development rate ( $\gamma(T)$ ) on temperature. A-D.**

198 Prior (red) and posterior (green) distributions for each of the fitted sub-parameters ( $\alpha$ ,  $T_0$ ,  $T_m$  and  $\sigma^2$ ). To allow

199 the posterior distribution to be seen clearly, x-axes limits are restricted to the minimum and maximum values in

200 the posterior. E-H. Trace plots corresponding to the posterior distributions shown in panels A-D. 100,000 steps

201 were run in the MCMC chain, with the first 50,000 discarded as burn-in (acceptance rate: 0.1982). Five chains

202 were run to compute the Gelman-Rubin statistic (which was 1.0008, 1.0004, 1.0010 and 1.0002 for  $\alpha$ ,  $T_0$ ,  $T_m$

203 and  $\sigma^2$ , respectively); the trace plots in panels E-H are from the first chain. I. Data describing the *Ae. aegypti*

204 egg-to-adult development rate as a function of temperature. J. Briere equation fit to the data in panel I (data –

205 green; median fit – red; 95% equal-tailed credible interval – shaded region).

206

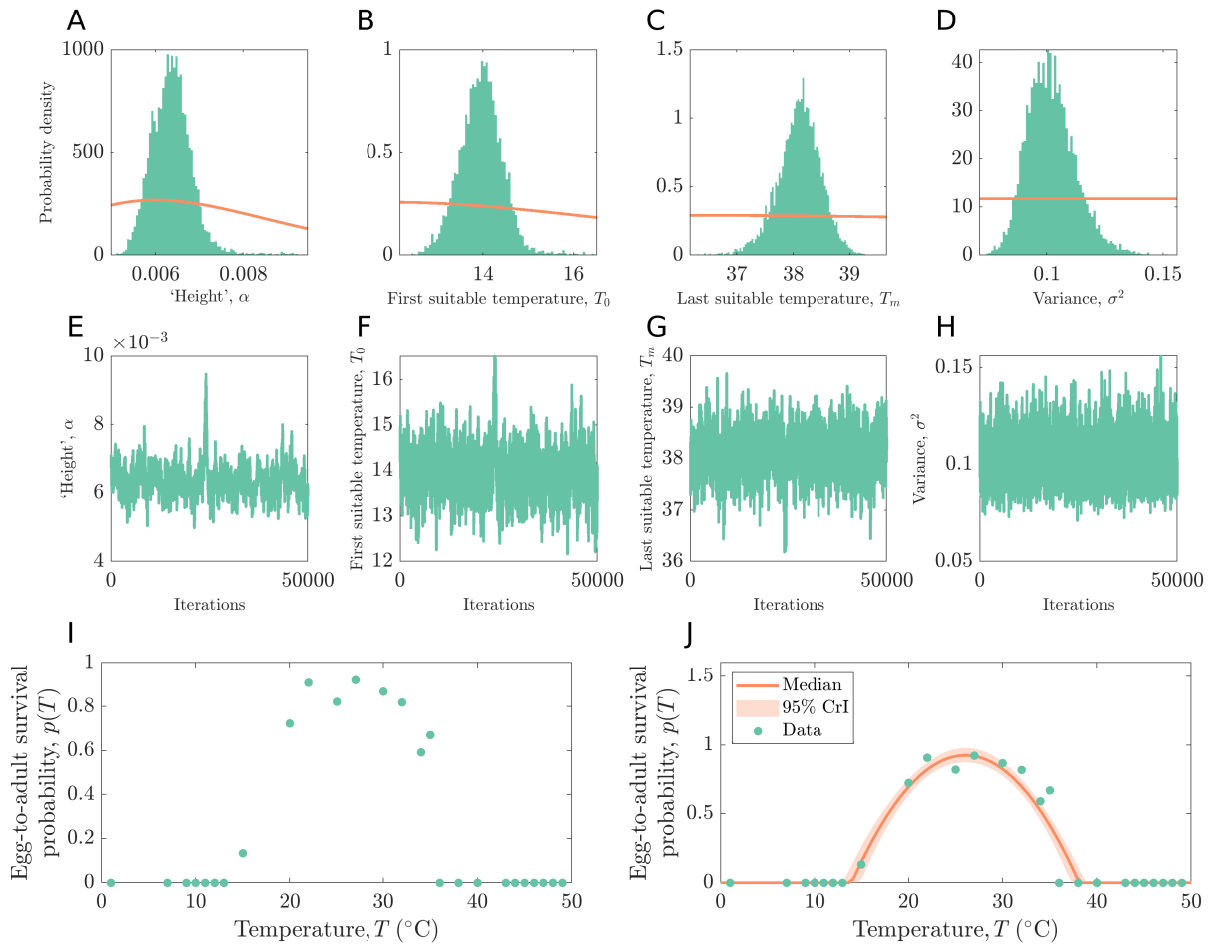

207

208 **Fig S4. The dependence of the *Ae. aegypti* egg-to-adult survival probability ( $p(T)$ ) on temperature. A-D.**

209 Prior (red) and posterior (green) distributions for each of the fitted sub-parameters ( $\alpha$ ,  $T_0$ ,  $T_m$  and  $\sigma^2$ ). To allow

210 the posterior distribution to be seen clearly, x-axes limits are restricted to the minimum and maximum values in

211 the posterior. E-H. Trace plots corresponding to the posterior distributions shown in panels A-D. 100,000 steps

212 were run in the MCMC chain, with the first 50,000 discarded as burn-in (acceptance rate: 0.2267). Five chains

213 were run to compute the Gelman-Rubin statistic (which was 1.0048, 1.0031, 1.0024 and 1.0004 for  $\alpha$ ,  $T_0$ ,  $T_m$

214 and  $\sigma^2$ , respectively); the trace plots in panels E-H are from the first chain. I. Data describing the *Ae. aegypti*

215 egg-to-adult survival probability as a function of temperature. J. Quadratic equation fit to the data in panel I

216 (data – green; median fit – red; 95% equal-tailed credible interval – shaded region). Fitted values were

217 constrained to lie between zero and one so that  $p(T)$  represents a valid probability (MCMC steps corresponding

218 to values outside of this range were discarded).

219

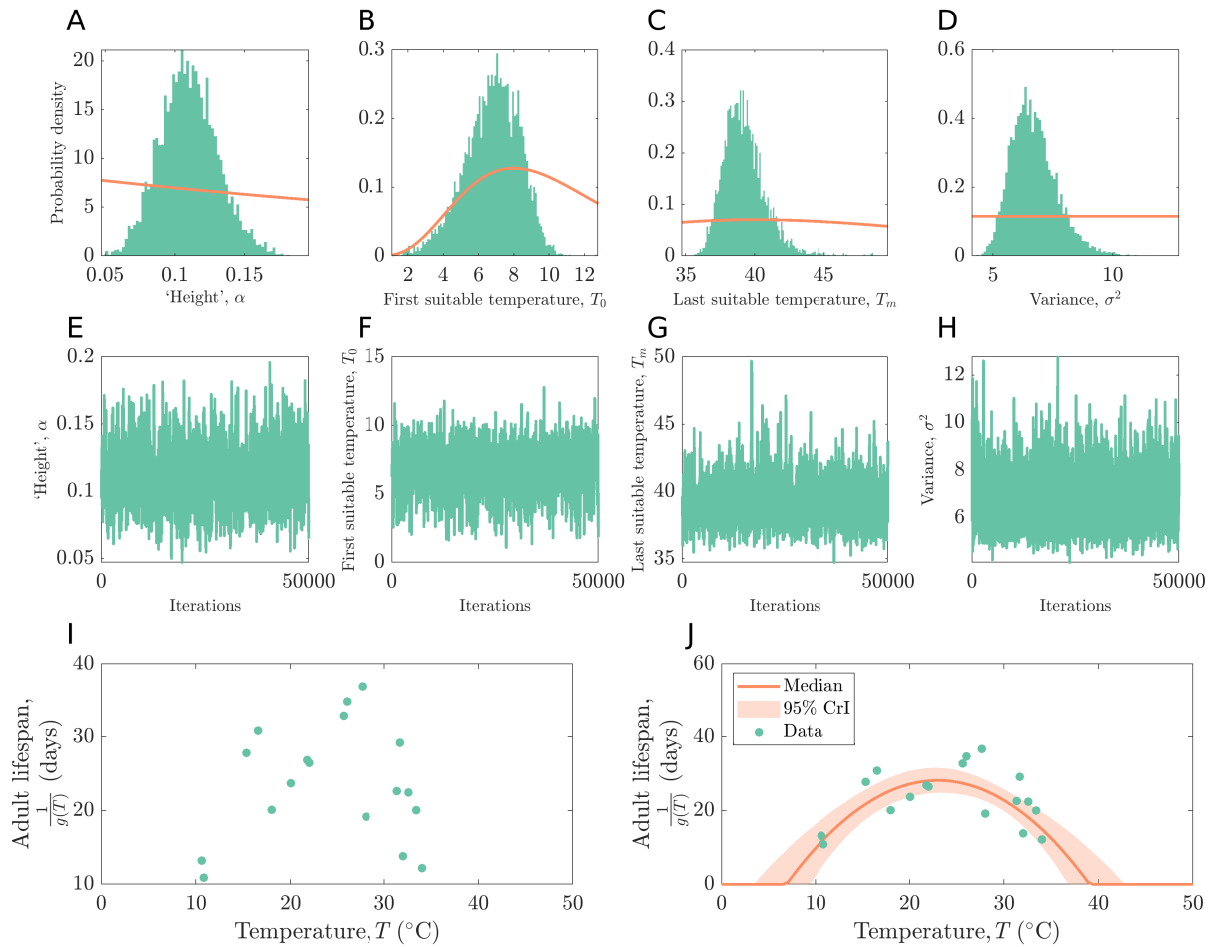

220

221

222

223

224

225

226

227

228

229

230

231

**Fig S5. The dependence of the *Ae. aegypti* adult lifespan ( $1/g(T)$ ) on temperature.** A-D. Prior (red) and posterior (green) distributions for each of the fitted sub-parameters ( $\alpha$ ,  $T_0$ ,  $T_m$  and  $\sigma^2$ ). To allow the posterior distribution to be seen clearly, x-axes limits are restricted to the minimum and maximum values in the posterior. E-H. Trace plots corresponding to the posterior distributions shown in panels A-D. 100,000 steps were run in the MCMC chain, with the first 50,000 discarded as burn-in (acceptance rate: 0.2141). Five chains were run to compute the Gelman-Rubin statistic (which was 1.0008, 1.0003, 1.0014 and 1.0001 for  $\alpha$ ,  $T_0$ ,  $T_m$  and  $\sigma^2$ , respectively); the trace plots in panels E-H are from the first chain. I. Data describing the *Ae. aegypti* adult lifespan as a function of temperature. J. Quadratic equation fit to the data in panel I (data – green; median fit – red; 95% equal-tailed credible interval – shaded region).

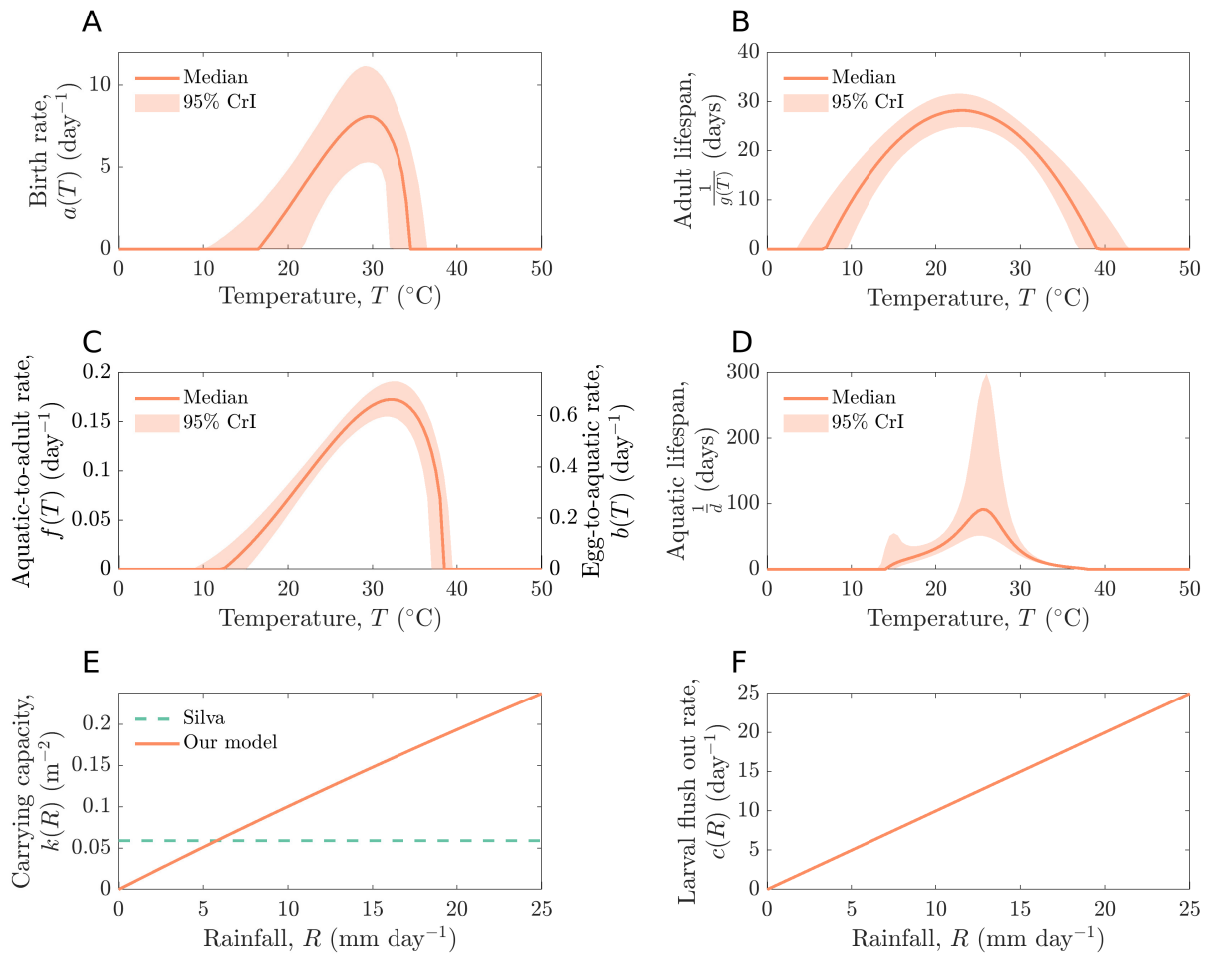

232

233

234

235

236

237

238

239

240

**Fig S6. The dependence of the parameters of the ecological model on temperature and rainfall.** Posterior distributions are shown for temperature-dependent parameters (median fit – red; 95% equal-tailed credible interval – shaded region): A. Birth rate ( $a(T)$ ); B. Adult lifespan ( $1/g(T)$ ); C. Aquatic-to-adult development rate (left y-axis,  $f(T)$ ) and egg-to-aquatic development rate (right y-axis,  $b(T)$ ); D. Aquatic stage lifespan ( $1/d(T)$ ). Rainfall-dependent parameter responses (red) for: E. Aquatic stage carrying capacity per unit area ( $k(R)$ ); F. Larval flush out rate ( $c(R)$ ). In panel E, the aquatic stage carrying capacity estimated in a previous study<sup>2</sup> is also plotted for comparison (green dotted); in that study location (Nova Iguaçu, Brazil), the average rainfall is 4.89mm per day, which is comparable with the output from our model.

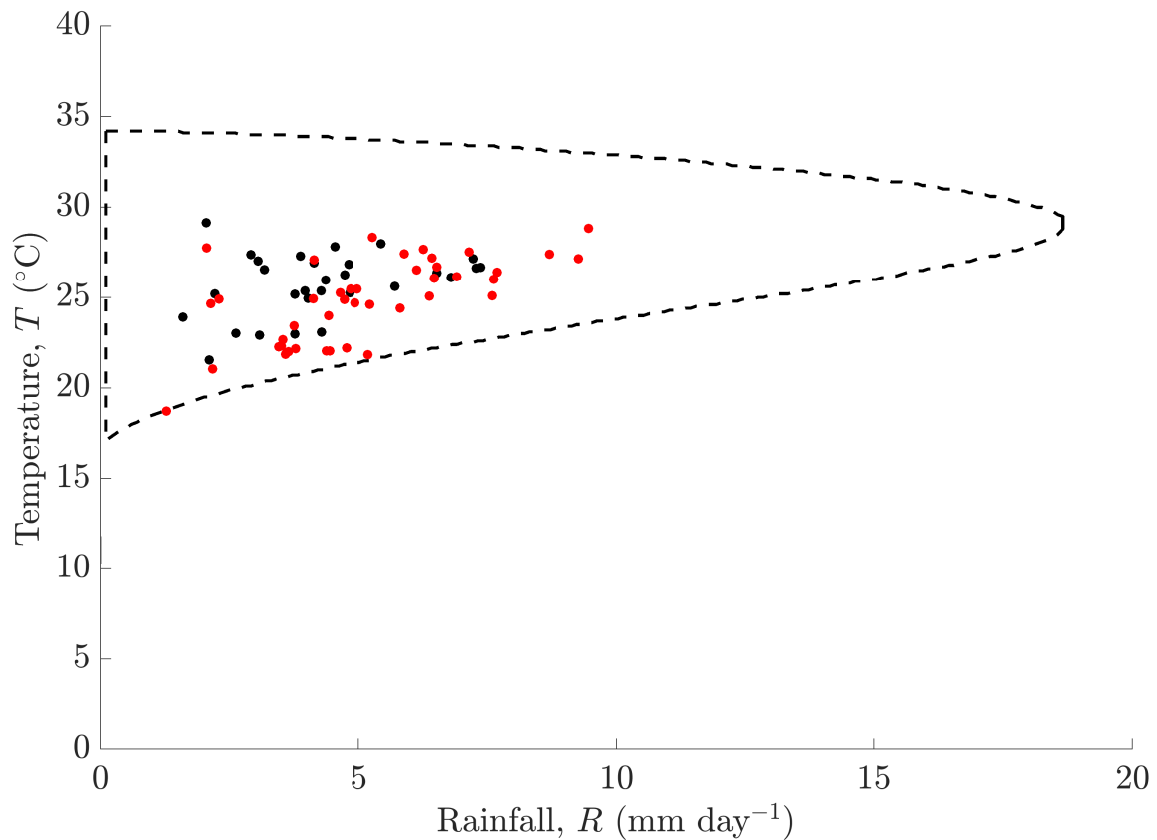

241

242 **Figure S7. Comparison of the ecological niche derived from our model and real-world data.** The black  
 243 dotted line is the 50<sup>th</sup> percentile ecological niche (Fig 1C in the main text). Black dots indicate the mean  
 244 temperature and rainfall in 29 countries with confirmed *Ae. aegypti* populations (locations were reported in  
 245 Kraemer *et al.*<sup>8</sup>, and temperature and rainfall values were averaged values across 2015 extracted from the World  
 246 Bank's Climate Change Knowledge Portal<sup>9</sup>). Red dots indicate temperature and rainfall values for 48 locations  
 247 that have experienced outbreaks of dengue virus disease (locations were reported by Liu *et al.*<sup>10</sup>, and  
 248 temperature and rainfall values for each outbreak are mean values across the period of the outbreak extracted  
 249 from the World Bank's Climate Change Knowledge Portal<sup>9</sup> and the National Centers for Environmental  
 250 Information's Climate Data Online tool<sup>11</sup>).

251



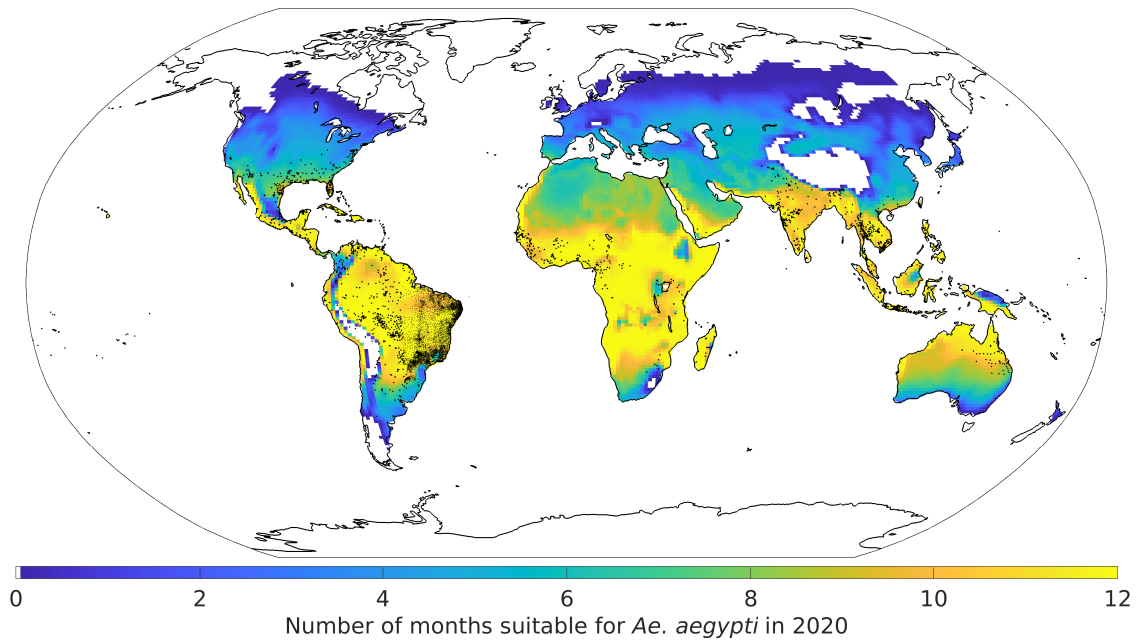

252

253 **Figure S8. Comparison of model-predicted global suitability for *Ae. aegypti* and known locations with *Ae.***  
254 ***aegypti* in 2020.** The number of months that are predicted to be suitable for *Ae. aegypti* in different locations  
255 globally in 2020. These results were obtained first for each CESM simulation individually, and then averaged  
256 across all CESM simulations. Black dots indicate locations with recorded *Ae. aegypti* populations.<sup>8</sup>

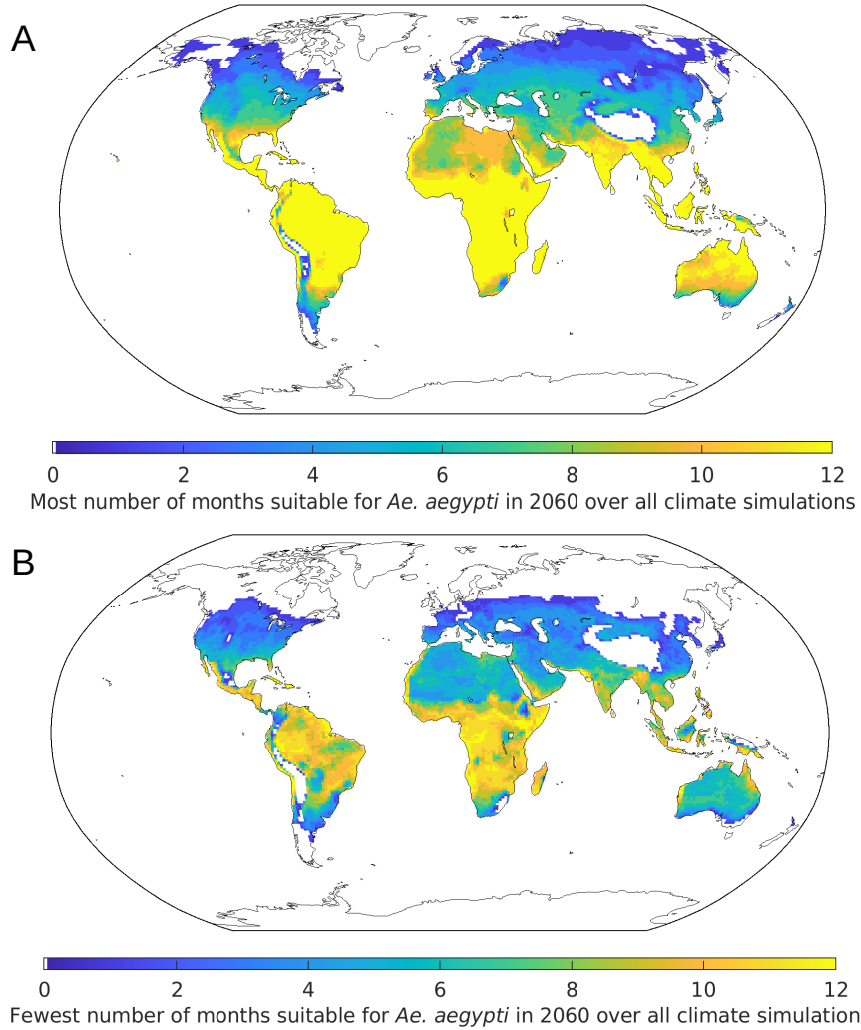

257

258 **Figure S9. The impact of climate variability on projected suitability for *Ae. aegypti* in 2060 in different**  
 259 **locations.** A. The maximum number of months that are projected to be suitable for *Ae. aegypti* in the year 2060.  
 260 B. The minimum number of months that are projected to be suitable for *Ae. aegypti* in the year 2060. In both  
 261 panels, for each latitude-longitude value, the CESM projection corresponding to the most (panel A) or fewest  
 262 (panel B) number of months that are suitable for *Ae. aegypti* in the year 2060 is chosen. This figure is analogous  
 263 to Fig 3 in the main text, but for the year 2060 rather than 2100.

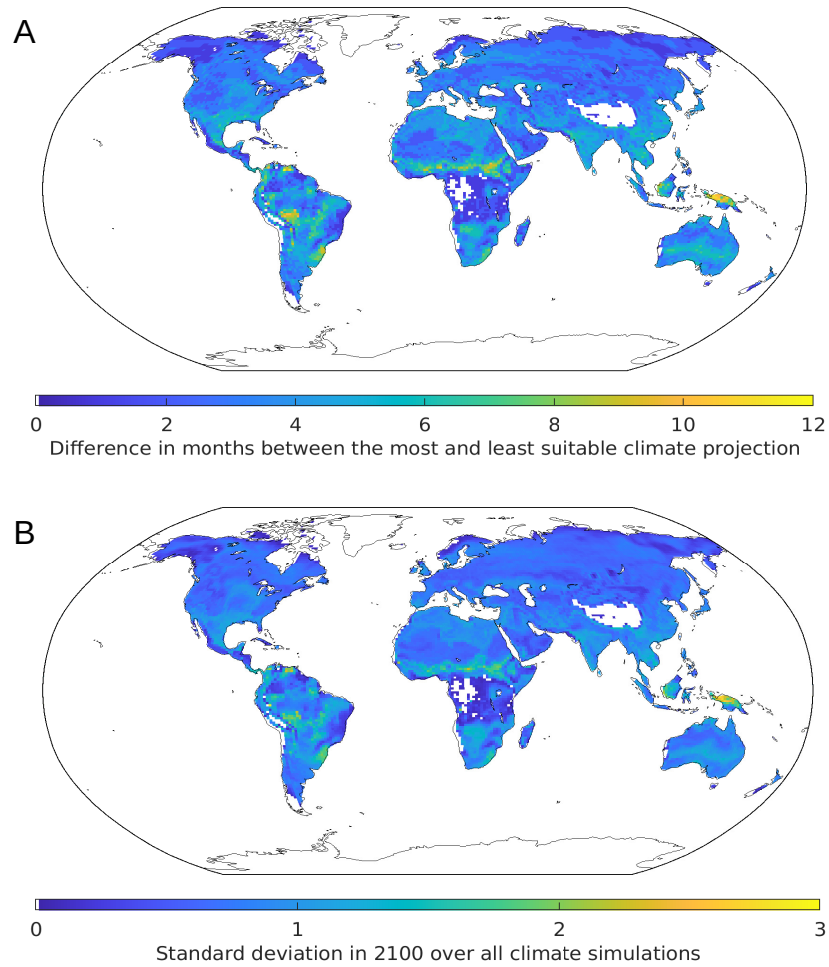

264

265 **Figure S10. Geographical variability in the impact of natural climate variability on climate suitability for**  
 266 ***Ae. aegypti* in different locations.** A. Difference between the minimum and maximum number of months of  
 267 2100 in each location that are projected to be suitable for *Ae. aegypti*. This plot shows the difference between  
 268 Figs 3A and 3B in the main text. B. The standard deviation in the number of months that are projected to be  
 269 suitable for *Ae. aegypti* in the year 2100 across the CESM projections. Values shown in panel B are computed  
 270 from the full range of 100 CESM projections.

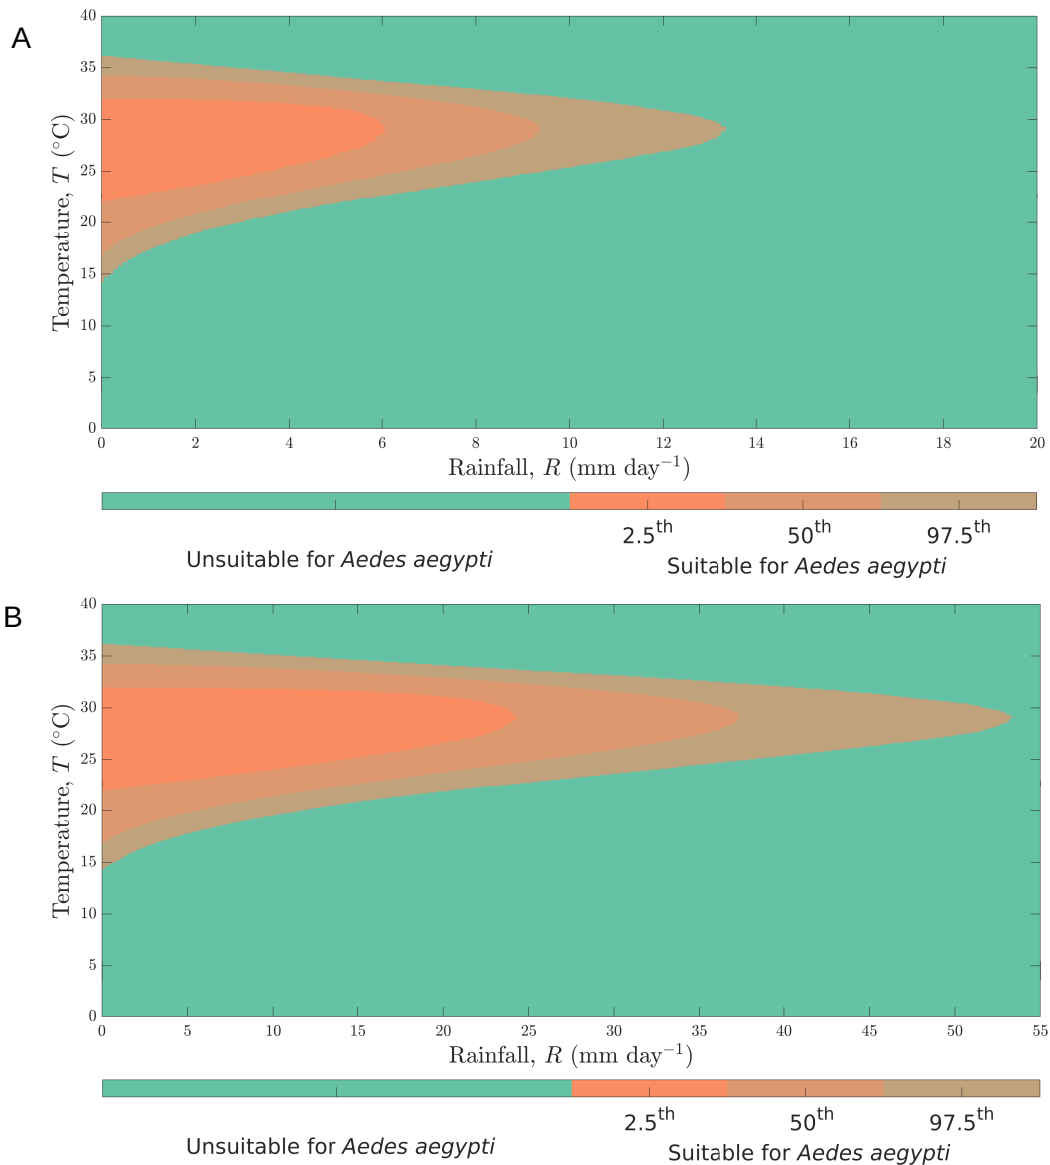

271

272 **Fig S11. Sensitivity of the ecological niche to the relationship between rainfall and the probability that**  
 273 **aquatic stage individuals are washed away.** A. The ecological niche derived from the ecological model when  
 274 aquatic stage individuals are washed away at a faster rate than assumed in our main analyses ( $c(R) = 2R$ ). B.  
 275 The ecological niche derived from the ecological model when aquatic stage individuals are washed away at a  
 276 slower rate than assumed in our main analyses ( $c(R) = \frac{1}{2}R$ ). Uncertainty in the ecological niche is represented  
 277 by different shades of orange and arises due to uncertainty in the parameter estimates of the ecological model.

278

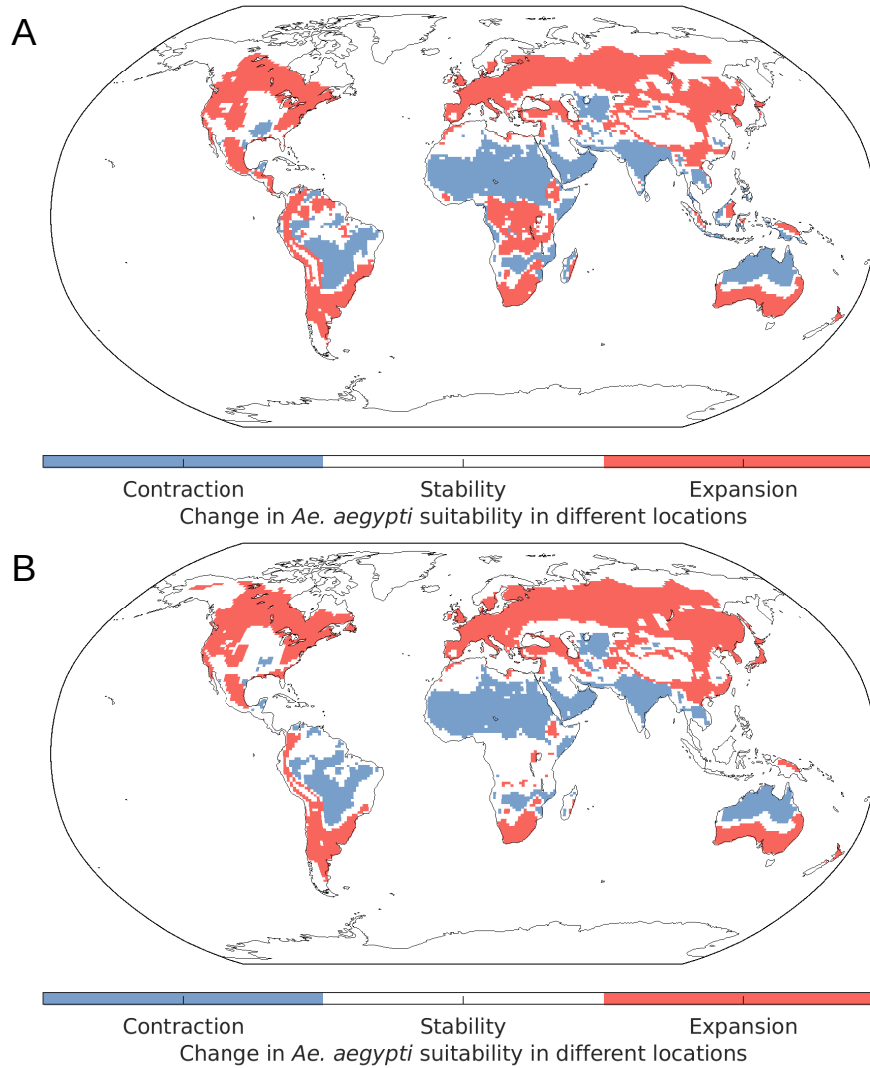

279

280 **Fig S12. Locations that are expected to see an increase or decrease in the suitability of climatic conditions**  
 281 **for *Ae. aegypti*, for different ecological niches.** Results shown here are analogous to those in Fig 2 in the main  
 282 text, but for: A. The ecological niche shown in Fig S11A ( $c(R) = 2R$ ). B. The ecological niche shown in Fig  
 283 S11B ( $c(R) = \frac{1}{2}R$ ). Locations in which the number of months that are suitable for *Ae. aegypti* increases by more  
 284 than one in 2100 compared to 2020 are shown in red. Locations with a corresponding decrease are shown in  
 285 blue. In each panel, the results were obtained by first calculating the change in the number of suitable months  
 286 for each CESM projection individually, and then averaging across all projections.

287

288

289 **References**

- 290 1 Mordecai EA, Cohen JM, Evans MV, *et al.* Detecting the impact of temperature on  
291 transmission of Zika, dengue, and chikungunya using mechanistic models. *PLoS Negl Trop*  
292 *Dis* 2017; **27**: e0005568.
- 293 2 Silva MR, Lugão PHG, Chapiro G. Modeling and simulation of the spatial population  
294 dynamics of the *Aedes aegypti* mosquito with an insecticide application. *Parasites Vectors*  
295 2020; **13**: 550.
- 296 3 Roberts GO, Rosenthal JS. Optimal scaling for various Metropolis-Hastings algorithms.  
297 *Statist Sci* 2001; **16**: 351–67.
- 298 4 Tompkins AM, Ermert V. A regional-scale, high resolution dynamical malaria model that  
299 accounts for population density, climate and surface hydrology. *Malar J* 2013; **12**: 65.
- 300 5 Kittayapong P, Kaeothaisong N, Ninphanomchai S, Limohpasmanee W. Combined sterile  
301 insect technique and incompatible insect technique: sex separation and quality of sterile  
302 *Aedes aegypti* male mosquitoes released in a pilot population suppression trial in Thailand.  
303 *Parasites Vectors* 2018; **11**: 657.
- 304 6 Parham PE, Michael E. Modeling the effects of weather and climate change on malaria  
305 transmission. *Environ Health Perspect* 2010; **118**: 620–6.
- 306 7 National Center for Atmospheric Research. The Climate Data Guide: Global surface  
307 temperatures (BEST: Berkeley Earth Surface Temperatures). 2023  
308 [www.climatedataguide.ucar.edu/climate-data/global-surface-temperatures-best-berkeley-](http://www.climatedataguide.ucar.edu/climate-data/global-surface-temperatures-best-berkeley-earth-surface-temperatures)  
309 [earth-surface-temperatures](http://www.climatedataguide.ucar.edu/climate-data/global-surface-temperatures-best-berkeley-earth-surface-temperatures).
- 310 8 Kraemer MUG, Sinka ME, Duda KA, *et al.* The global distribution of the arbovirus vectors  
311 *Aedes aegypti* and *Ae. albopictus*. *eLife* 2015; **4**: e08347–e08347.
- 312 9 World Bank Group. Climate Change Knowledge Portal (CCKP). 2022  
313 <https://climateknowledgeportal.worldbank.org/>.
- 314 10 Liu Y, Lillepold K, Semenza JC, Tozan Y, Quam MBM, Rocklöv J. Reviewing estimates  
315 of the basic reproduction number for dengue, Zika and chikungunya across global climate  
316 zones. *Environment Res* 2020; **182**: 109114.
- 317 11 National Oceanic and Atmospheric Administration. National Centers for Environmental  
318 Information: Climate Data Online. 2023. [www.ncdc.noaa.gov/cdo-web/](http://www.ncdc.noaa.gov/cdo-web/).
- 319
